# Supplementary material for: Compound flood potential from storm surge and heavy precipitation in coastal China
Source: Copernicus journal article supplement (doi:10.5194/hess-2020-377), 2020-07-30
Supplement: Supplementary file 1 [file hess-2020-377-supplement.pdf]

# Compound flood potential from storm surge and rainfall in coastal China

Fig. S1-S9: Meteorological conditions for associated with compound and non-compound events at the other 9 TGs (not shown in the manuscript): (a, d, g) sea-level pressure (mbar), (b, e, h) wind speed (m/s) and direction (grey arrows), and (c, f, i) precipitable water content (kg m<sup>-2</sup>) during (a, b, c) compound events with high storm surge and high precipitation, (d, e, f) for non-compound events with high storm surge and low precipitation, and (g, h, i) non-compound events with low storm surge and high precipitation.

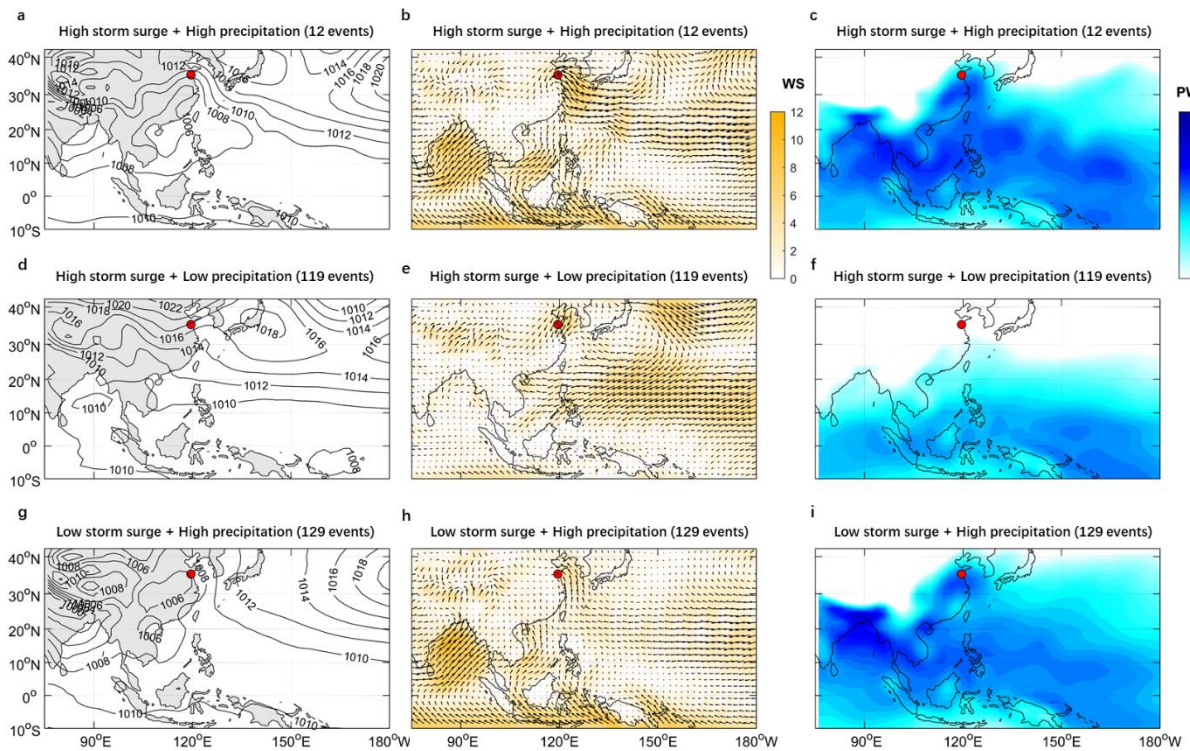

Fig.S1 Shijiusuo (TG1).

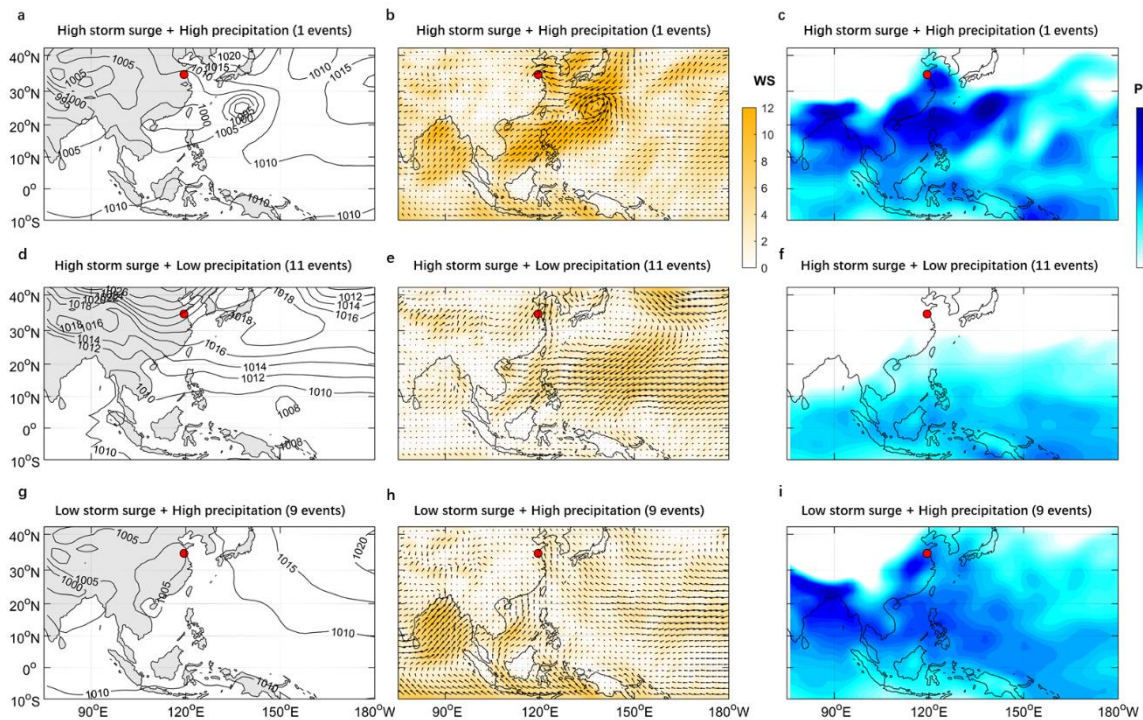

Fig.S2 Liyangang (TG2).

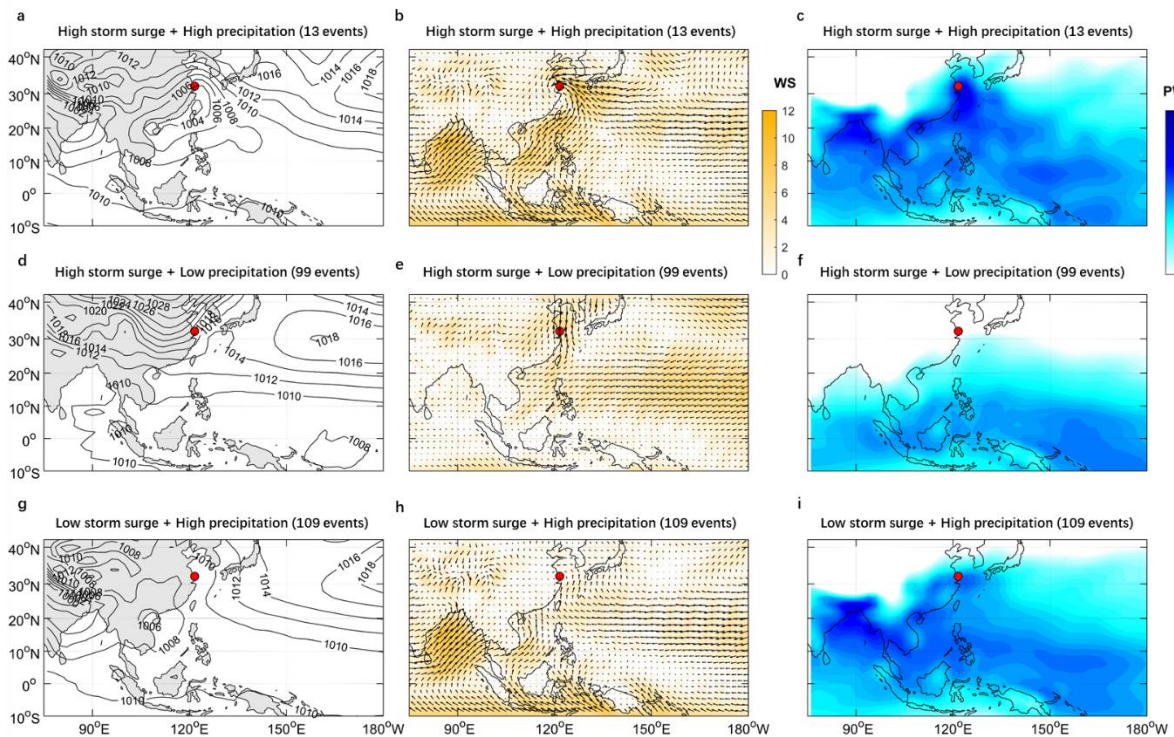

Fig.S3 Lusi (TG3).

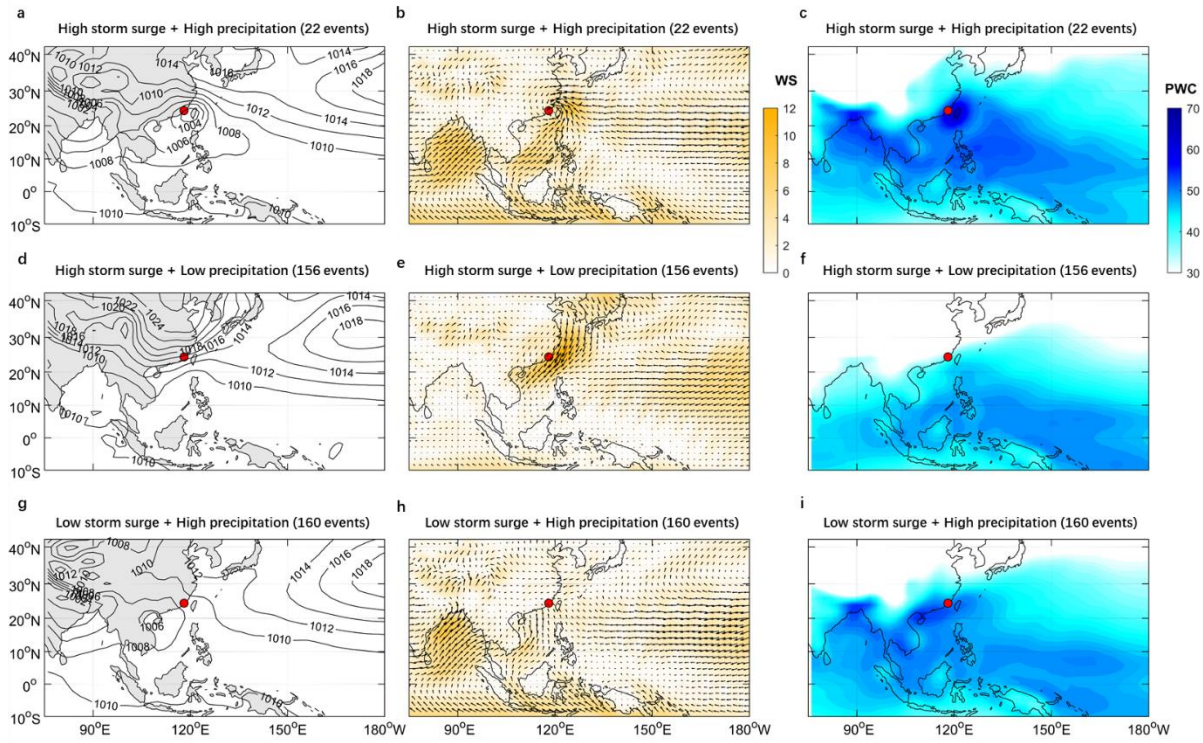

Fig.S4 Xiamen (TG5).

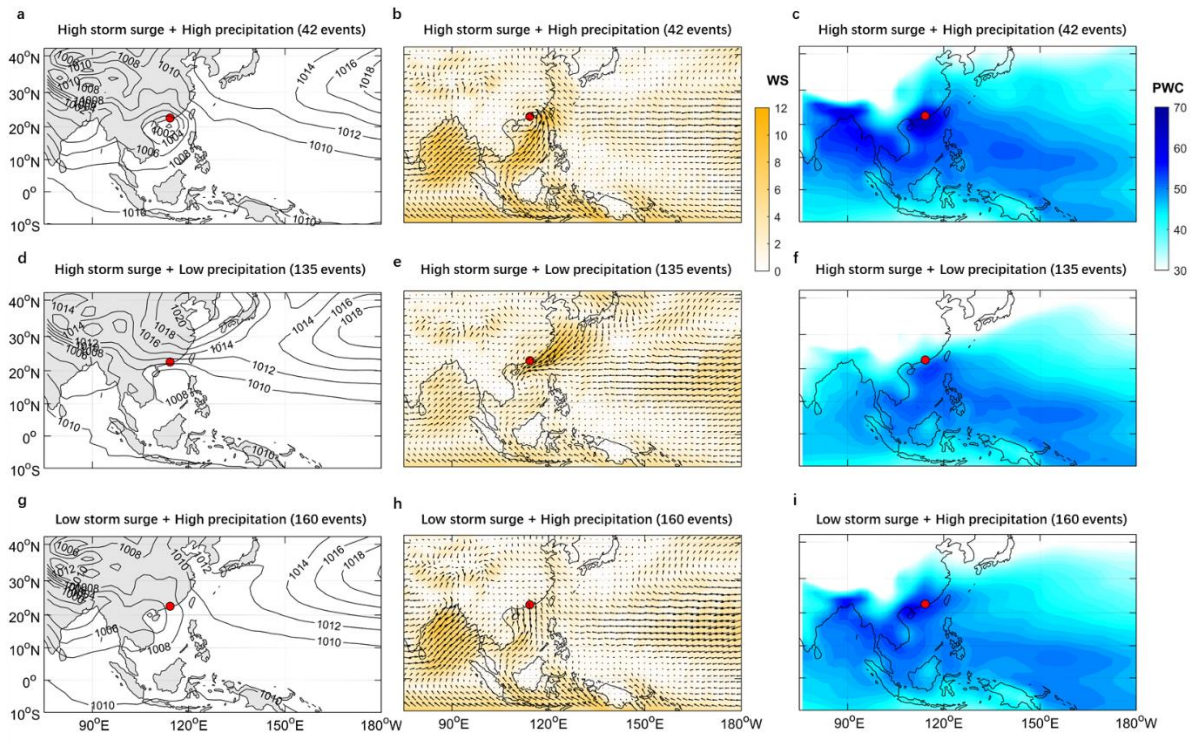

Fig.S5 Hong Kong (TG7).

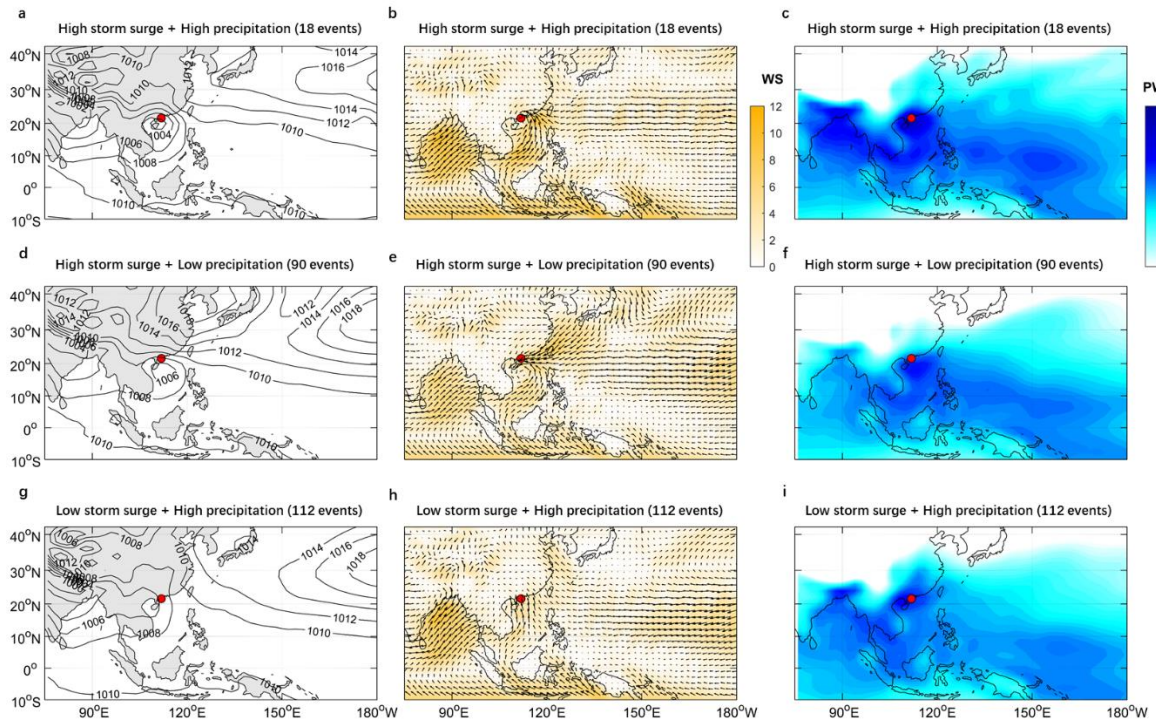

Fig.S6 Zhapo (TG8).

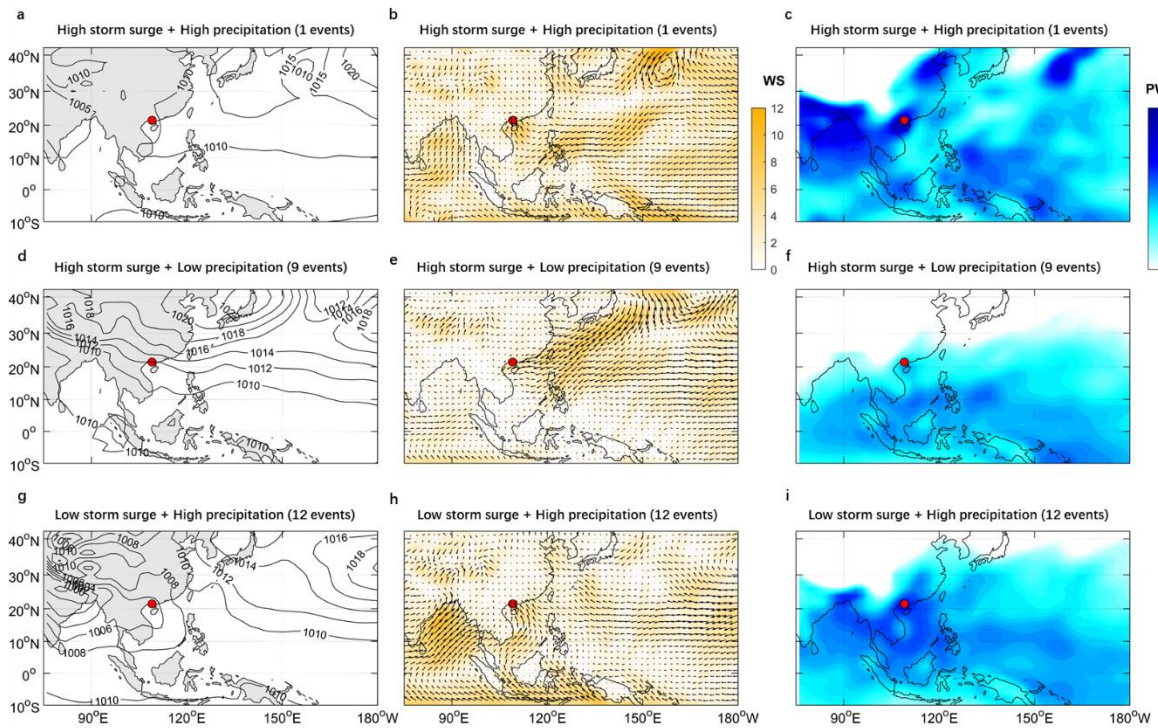

Fig.S7 Beihai (TG9).

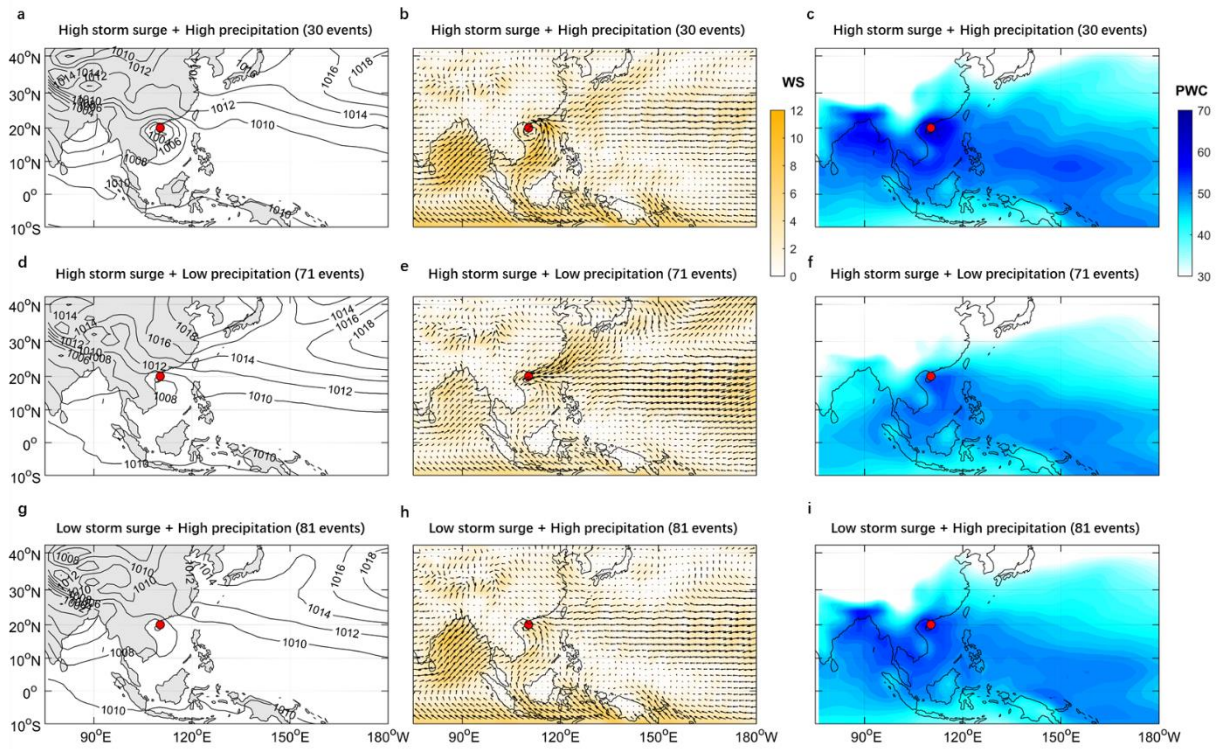

Fig.S8 Haikou (TG10).

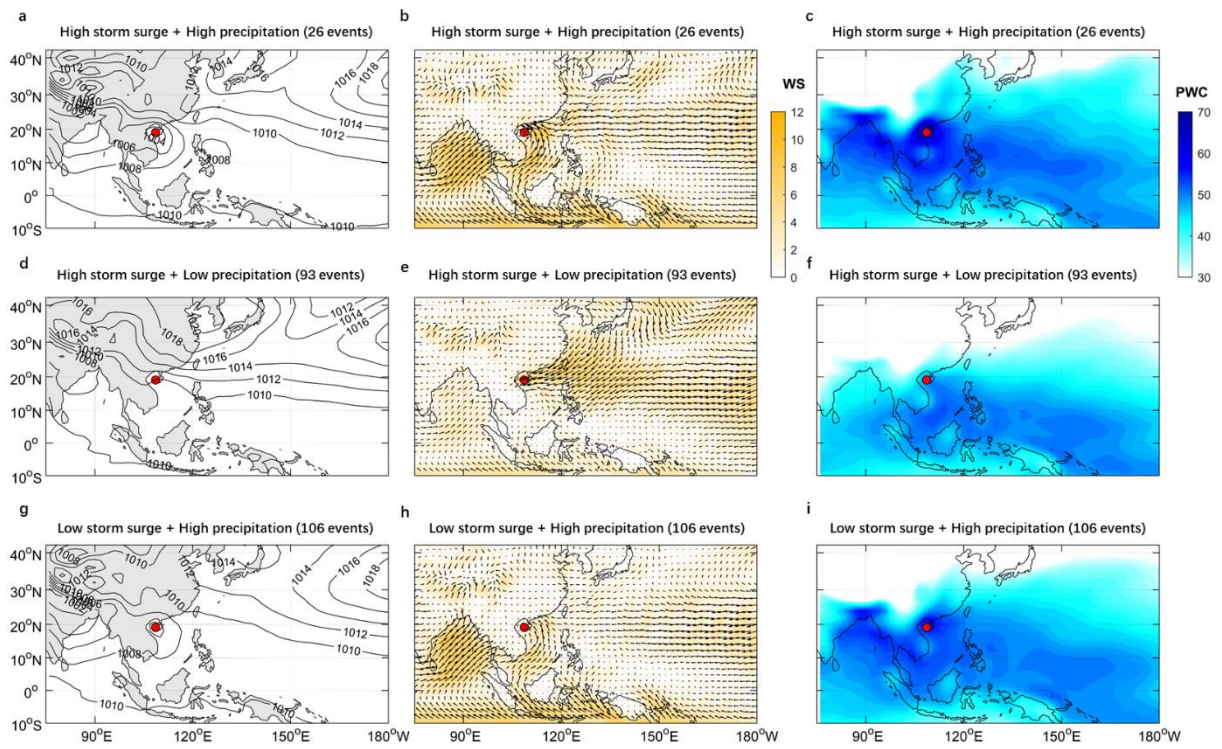

Fig.S9 Dongfang (TG11).
